# Supplementary material
Source: PubMed Central journal article supplement (PMC5553288)

## Physicochemical parameters affecting the perception of borehole water quality in Ghana

Alexandra V. Kulinkina,<sup>a,\*</sup> Jeanine D. Plummer,<sup>b</sup> Kenneth K. H. Chui,<sup>c</sup> Karen C. Kosinski,<sup>d</sup>  
Theodora Adomako-Adjei,<sup>e</sup> Andrey I. Egorov,<sup>f</sup> Elena N. Naumova<sup>a, c, g</sup>

<sup>a</sup> Tufts University School of Engineering, Medford, MA, USA

<sup>b</sup> Water Quality & Treatment Solutions, Inc., Brookfield, MA, USA

<sup>c</sup> Tufts University School of Medicine, Boston, MA, USA

<sup>d</sup> Tufts University School of Arts and Sciences, Medford, MA, USA

<sup>e</sup> Community Water and Sanitation Agency, Accra, Ghana

<sup>f</sup> U.S. Environmental Protection Agency, Chapel Hill, MA, USA

<sup>g</sup> Tufts University Friedman School of Nutrition Science and Policy, Boston, MA, USA

\* Correspondence to Alexandra V. Kulinkina

Email: alexandra.kulinkina@tufts.edu

Address: 200 College Avenue, Medford, MA, USA 2155

### SUPPLEMENTAL INFORMATION

Table S1. Spearman's rank correlation matrix for measured water quality parameters

Table S2. Kendall's Tau correlation matrix for reported water quality problems

Table S3. Logistic regression model results stratified by season

Fig. S1. Boxplot comparison of water quality values by presence/absence of salty taste

Fig. S2. Boxplot comparison of water quality values by presence/absence of particles

Fig. S3. Boxplot comparison of water quality values by presence/absence of scent

Fig. S4. Boxplot comparison of water quality values by presence/absence of oily sheen

Fig. S5. Boxplot comparison of water quality values by presence/absence of food staining

Fig. S6. Map of geological formations and interpolated surfaces for iron and TDS

**Table S1.** Spearman's rank correlation matrix for measured water quality parameters. Correlation coefficients are shown in the top and p-values in bottom portions of the matrix. Statistically significant values ( $p < 0.05$ ) are bolded.

|                               | pH     | TDS         | Turb   | Ca <sup>2+</sup> | Mg <sup>2+</sup> | TotH        | TotA        | Cl <sup>-</sup> | Na <sup>+</sup> | K <sup>+</sup> | NO <sub>3</sub> -N | NO <sub>2</sub> -N | NH <sub>3</sub> -H | F <sup>-</sup> | SO <sub>4</sub> <sup>2-</sup> | PO <sub>4</sub> <sup>3-</sup> | Mn           | Fe           |
|-------------------------------|--------|-------------|--------|------------------|------------------|-------------|-------------|-----------------|-----------------|----------------|--------------------|--------------------|--------------------|----------------|-------------------------------|-------------------------------|--------------|--------------|
| pH                            | --     | <b>0.60</b> | 0.03   | <b>0.72</b>      | <b>0.66</b>      | <b>0.70</b> | <b>0.82</b> | <b>0.27</b>     | <b>0.42</b>     | <b>0.28</b>    | <b>-0.15</b>       | <b>0.17</b>        | <b>0.60</b>        | <b>0.42</b>    | <b>0.41</b>                   | 0.09                          | <b>0.47</b>  | <b>0.35</b>  |
| TDS                           | <0.001 | --          | 0.01   | <b>0.76</b>      | <b>0.76</b>      | <b>0.85</b> | <b>0.69</b> | <b>0.72</b>     | <b>0.81</b>     | <b>0.62</b>    | -0.08              | <b>0.17</b>        | <b>0.41</b>        | <b>0.21</b>    | <b>0.67</b>                   | -0.10                         | <b>0.49</b>  | 0.03         |
| Turb                          | 0.620  | 0.851       | --     | 0.06             | 0.01             | 0.03        | <b>0.21</b> | <b>-0.21</b>    | 0.05            | 0.07           | <b>-0.38</b>       | -0.01              | -0.01              | -0.05          | -0.10                         | 0.05                          | <b>0.21</b>  | <b>0.45</b>  |
| Ca <sup>2+</sup>              | <0.001 | <0.001      | 0.297  | --               | <b>0.71</b>      | <b>0.84</b> | <b>0.77</b> | <b>0.45</b>     | <b>0.54</b>     | <b>0.41</b>    | -0.13              | <b>0.20</b>        | <b>0.47</b>        | <b>0.26</b>    | <b>0.47</b>                   | 0.09                          | <b>0.51</b>  | <b>0.26</b>  |
| Mg <sup>2+</sup>              | <0.001 | <0.001      | 0.871  | <0.001           | --               | <b>0.88</b> | <b>0.71</b> | <b>0.54</b>     | <b>0.57</b>     | <b>0.43</b>    | -0.11              | <b>0.36</b>        | <b>0.41</b>        | <b>0.21</b>    | <b>0.55</b>                   | -0.04                         | <b>0.49</b>  | <b>0.18</b>  |
| TotH                          | <0.001 | <0.001      | 0.643  | <0.001           | <0.001           | --          | <b>0.75</b> | <b>0.52</b>     | <b>0.58</b>     | <b>0.42</b>    | -0.07              | <b>0.26</b>        | <b>0.41</b>        | <b>0.21</b>    | <b>0.57</b>                   | -0.04                         | <b>0.54</b>  | <b>0.23</b>  |
| TotA                          | <0.001 | <0.001      | <0.001 | <0.001           | <0.001           | <0.001      | --          | <b>0.30</b>     | <b>0.61</b>     | <b>0.43</b>    | <b>-0.29</b>       | <b>0.23</b>        | <b>0.39</b>        | <b>0.34</b>    | <b>0.31</b>                   | <b>0.12</b>                   | <b>0.49</b>  | <b>0.32</b>  |
| Cl <sup>-</sup>               | <0.001 | <0.001      | <0.001 | <0.001           | <0.001           | <0.001      | <0.001      | --              | <b>0.71</b>     | <b>0.66</b>    | 0.11               | <b>0.34</b>        | <b>0.31</b>        | 0.07           | <b>0.66</b>                   | <b>-0.28</b>                  | <b>0.23</b>  | <b>-0.33</b> |
| Na <sup>+</sup>               | <0.001 | <0.001      | 0.361  | <0.001           | <0.001           | <0.001      | <0.001      | <0.001          | --              | <b>0.78</b>    | <b>-0.15</b>       | <b>0.27</b>        | <b>0.30</b>        | <b>0.22</b>    | <b>0.57</b>                   | -0.06                         | <b>0.36</b>  | -0.13        |
| K <sup>+</sup>                | <0.001 | <0.001      | 0.257  | <0.001           | <0.001           | <0.001      | <0.001      | <0.001          | <0.001          | --             | <b>-0.20</b>       | <b>0.27</b>        | <b>0.20</b>        | <b>0.16</b>    | <b>0.54</b>                   | <b>-0.22</b>                  | <b>0.22</b>  | <b>-0.23</b> |
| NO <sub>3</sub> -N            | 0.010  | 0.187       | <0.001 | 0.030            | 0.057            | 0.241       | <0.001      | 0.054           | 0.009           | <0.001         | --                 | -0.03              | -0.01              | -0.07          | 0.04                          | -0.10                         | <b>-0.19</b> | <b>-0.24</b> |
| NO <sub>2</sub> -N            | 0.003  | <0.001      | 0.822  | <0.001           | <0.001           | <0.001      | <0.001      | <0.001          | <0.001          | <0.001         | 0.631              | --                 | <b>0.14</b>        | -0.08          | <b>0.24</b>                   | <b>-0.23</b>                  | <b>0.16</b>  | 0.03         |
| NH <sub>3</sub> -H            | <0.001 | <0.001      | 0.889  | <0.001           | <0.001           | <0.001      | <0.001      | <0.001          | <0.001          | <0.001         | 0.923              | 0.016              | --                 | <b>0.21</b>    | <b>0.42</b>                   | <b>0.16</b>                   | <b>0.42</b>  | <b>0.29</b>  |
| F <sup>-</sup>                | <0.001 | <0.001      | 0.378  | <0.001           | <0.001           | <0.001      | <0.001      | 0.259           | <0.001          | 0.007          | 0.242              | 0.149              | <0.001             | --             | <b>0.22</b>                   | -0.02                         | <b>0.21</b>  | <b>0.17</b>  |
| SO <sub>4</sub> <sup>2-</sup> | <0.001 | <0.001      | 0.081  | <0.001           | <0.001           | <0.001      | <0.001      | <0.001          | <0.001          | <0.001         | 0.470              | <0.001             | <0.001             | <0.001         | --                            | <b>-0.14</b>                  | <b>0.32</b>  | -0.09        |
| PO <sub>4</sub> <sup>3-</sup> | 0.11   | 0.070       | 0.386  | 0.103            | 0.475            | 0.535       | 0.033       | <0.001          | 0.329           | <0.001         | 0.086              | <0.001             | 0.007              | 0.764          | 0.019                         | --                            | <b>0.18</b>  | <b>0.19</b>  |
| Mn                            | <0.001 | <0.001      | <0.001 | <0.001           | <0.001           | <0.001      | <0.001      | <0.001          | <0.001          | <0.001         | 0.001              | 0.005              | <0.001             | <0.001         | <0.001                        | 0.003                         | --           | <b>0.51</b>  |
| Fe                            | <0.001 | 0.577       | <0.001 | <0.001           | 0.002            | <0.001      | <0.001      | <0.001          | 0.029           | <0.001         | <0.001             | 0.565              | <0.001             | 0.003          | 0.135                         | <0.001                        | <0.001       | --           |

**Table S2.** Kendall's Tau correlation matrix for reported water quality problems. Correlation coefficients are shown in the top and p-values in bottom portions of the matrix. Statistically significant values ( $p < 0.05$ ) are bolded.

|               | Scent  | Salty taste | Particles   | Oily sheen  | Food staining |
|---------------|--------|-------------|-------------|-------------|---------------|
| Scent         | --     | 0.09        | <b>0.27</b> | <b>0.47</b> | <b>0.44</b>   |
| Salty taste   | 0.14   | --          | 0.06        | <b>0.15</b> | <b>0.24</b>   |
| Particles     | <0.001 | 0.34        | --          | <b>0.18</b> | <b>0.17</b>   |
| Oily sheen    | <0.001 | 0.01        | 0.002       | --          | <b>0.60</b>   |
| Food staining | <0.001 | <0.001      | 0.004       | <0.001      | --            |

**Table S3.** Logistic regression models stratified by season

| <i>Complaint</i>    | <i>WQ</i> | <i>Unit <math>\Delta</math> (mg/L)</i> | <i>OR (CI<sub>95%</sub>)</i> | <i>p-value</i> | <i>R<sup>2</sup></i> |
|---------------------|-----------|----------------------------------------|------------------------------|----------------|----------------------|
| <b>Dry season</b>   |           |                                        |                              |                |                      |
| Salty taste         | TDS       | 100                                    | 2.53 (1.64, 3.89)            | <0.001         | 0.29                 |
| Scent               | Iron      | 1.00                                   | 4.93 (2.03, 11.9)            | <0.001         | 0.19                 |
| Oily sheen          | Iron      | 1.00                                   | 9.39 (3.21, 27.4)            | <0.001         | 0.33                 |
| Food staining       | Iron      | 1.00                                   | 4.25 (1.98, 9.12)            | <0.001         | 0.21                 |
| <b>Rainy season</b> |           |                                        |                              |                |                      |
| Salty taste         | TDS       | 100                                    | 1.68 (1.35, 2.10)            | <0.001         | 0.12                 |
| Scent               | Iron      | 1.00                                   | 2.47 (1.63, 3.73)            | <0.001         | 0.09                 |
| Oily sheen          | Iron      | 1.00                                   | 24.7 (8.06, 75.5)            | <0.001         | 0.33                 |
| Food staining       | Iron      | 1.00                                   | 5.91 (3.21, 10.9)            | <0.001         | 0.23                 |

**Fig. S1.** Boxplots comparing the distribution of water quality values (y-axis) by presence or absence of the salty taste complaint (x-axis) in the dry (red) and rainy (blue) season samples.

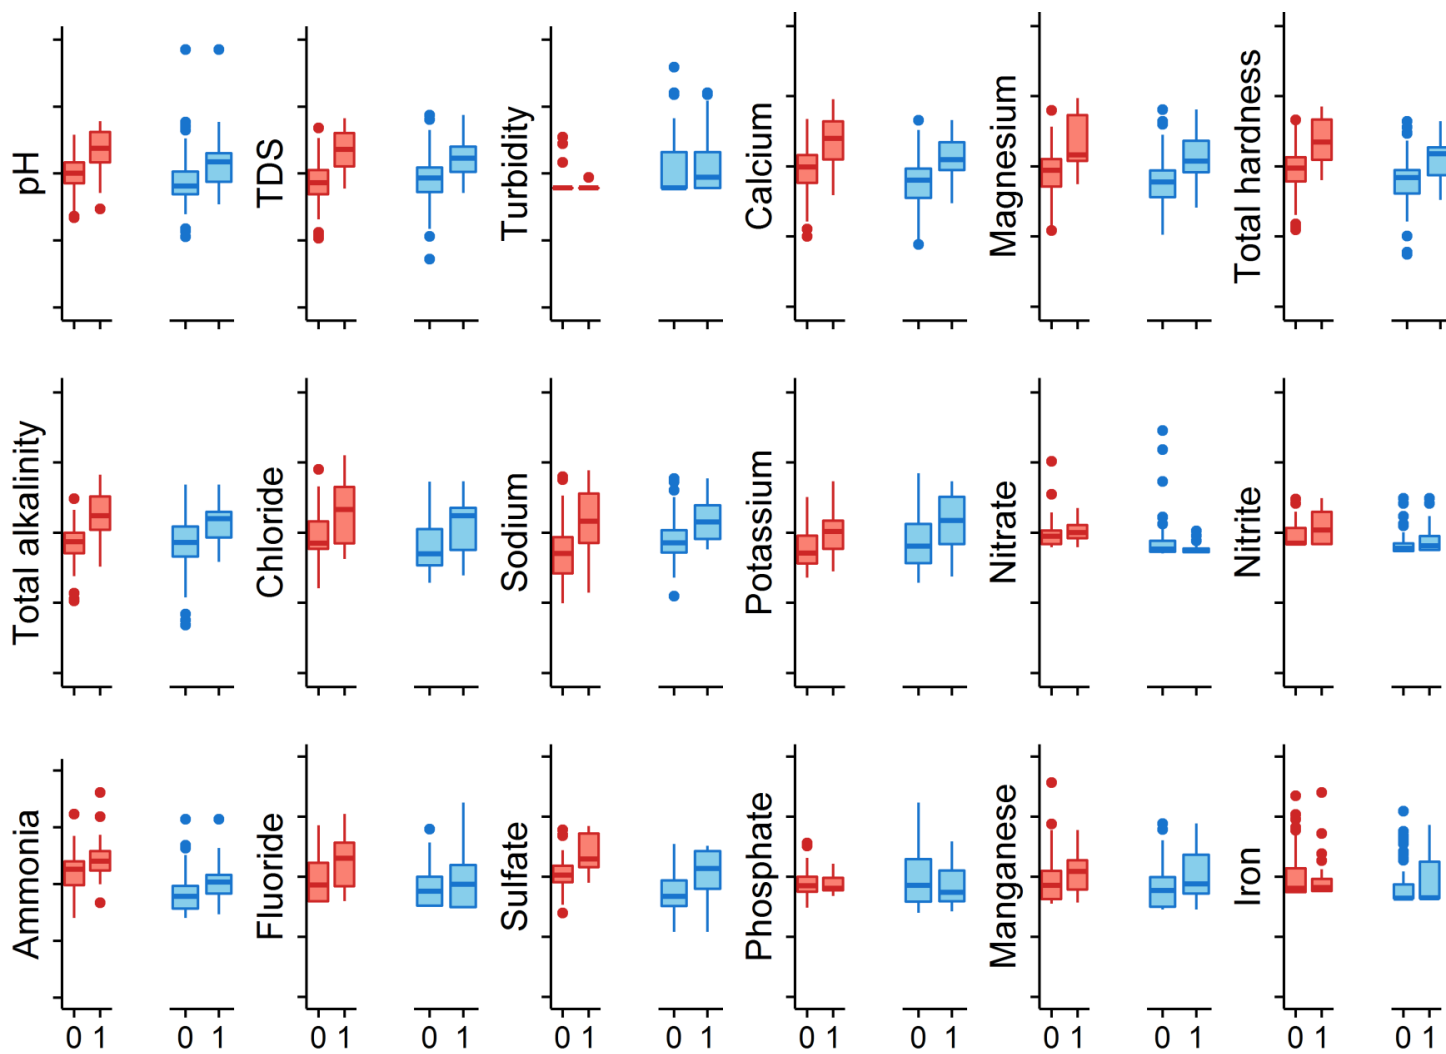

**Fig. S2.** Boxplots comparing the distribution of water quality values (y-axis) by presence or absence of the particles complaint (x-axis) in the dry (red) and rainy (blue) season samples.

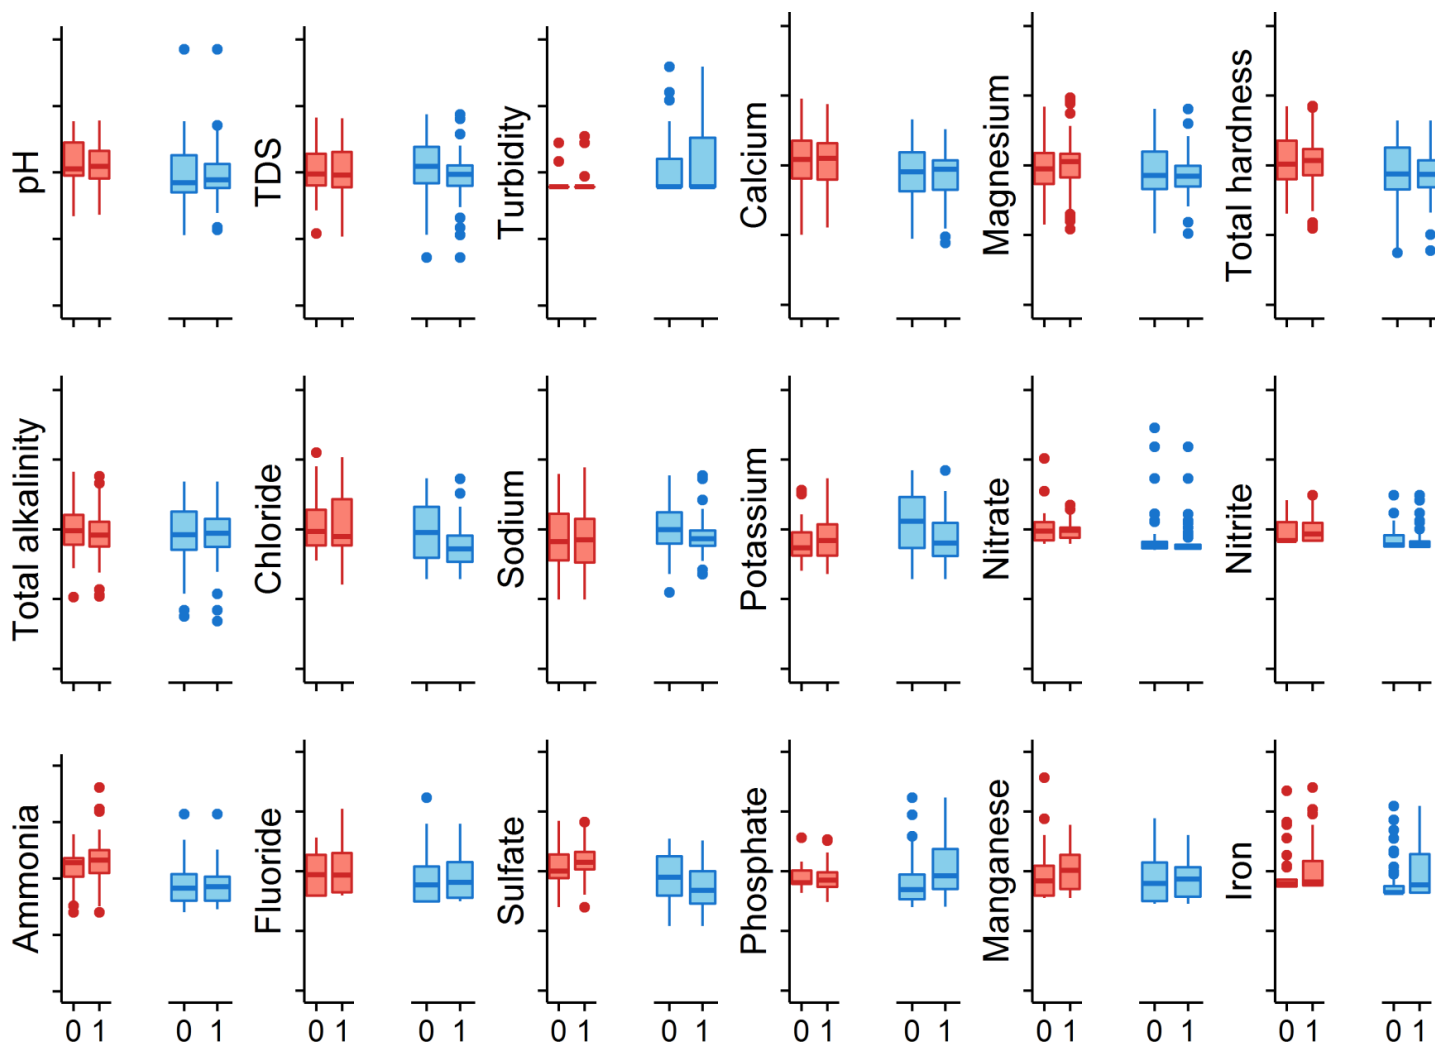

**Fig. S3.** Boxplots comparing the distribution of water quality values (y-axis) by presence or absence of the scent complaint (x-axis) in the dry (red) and rainy (blue) season samples.

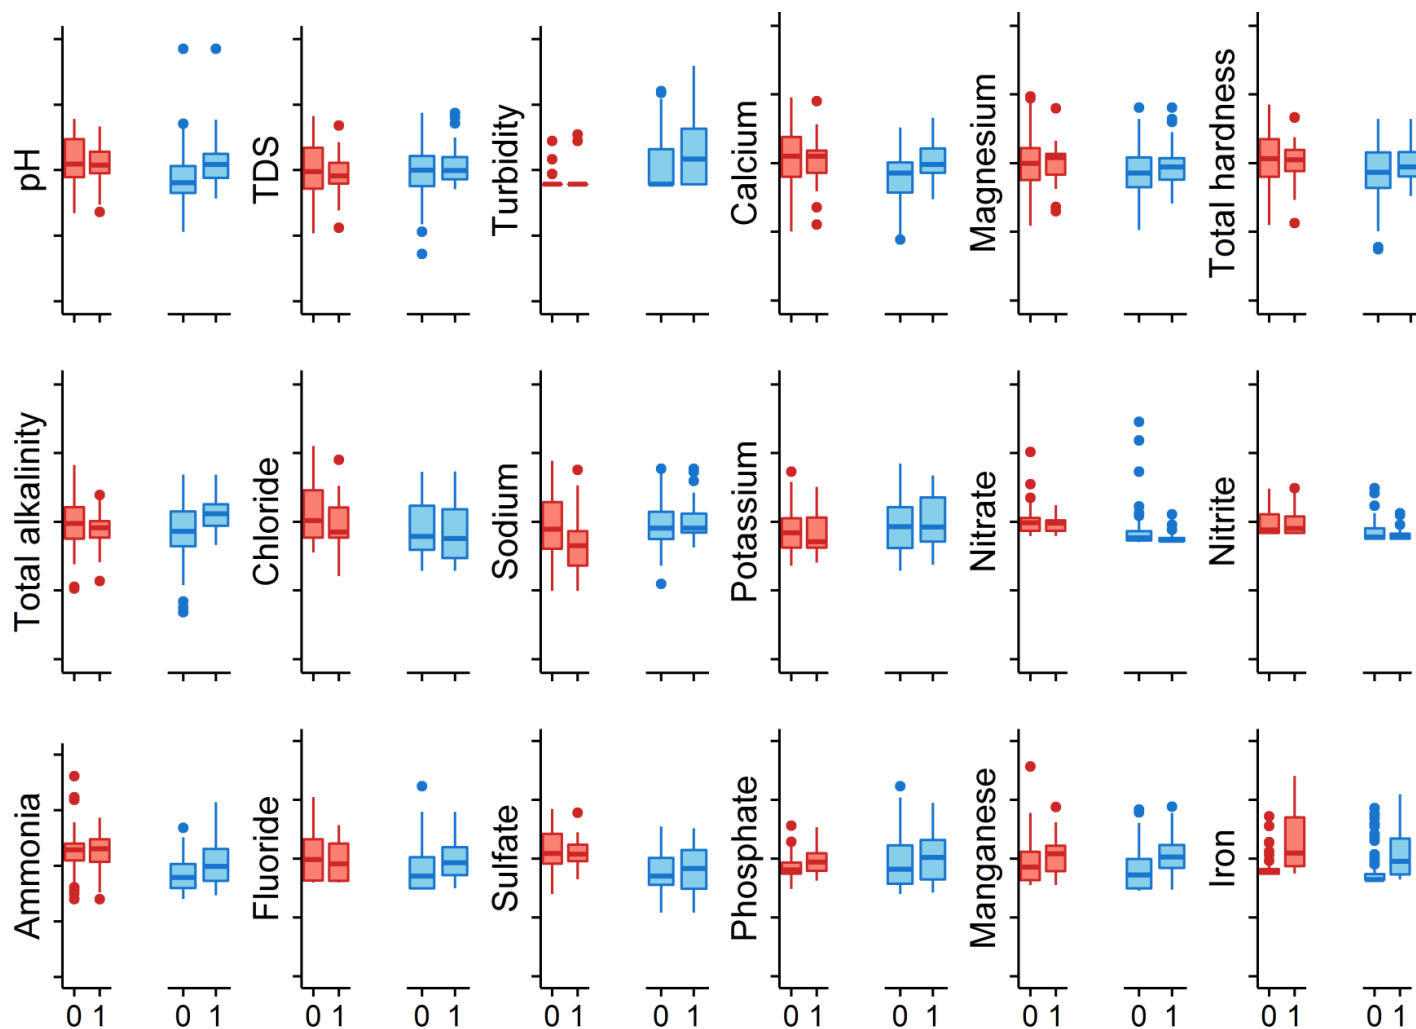

**Fig. S4.** Boxplots comparing the distribution of water quality values (y-axis) by presence or absence of the oily sheen complaint (x-axis) in the dry (red) and rainy (blue) season samples.

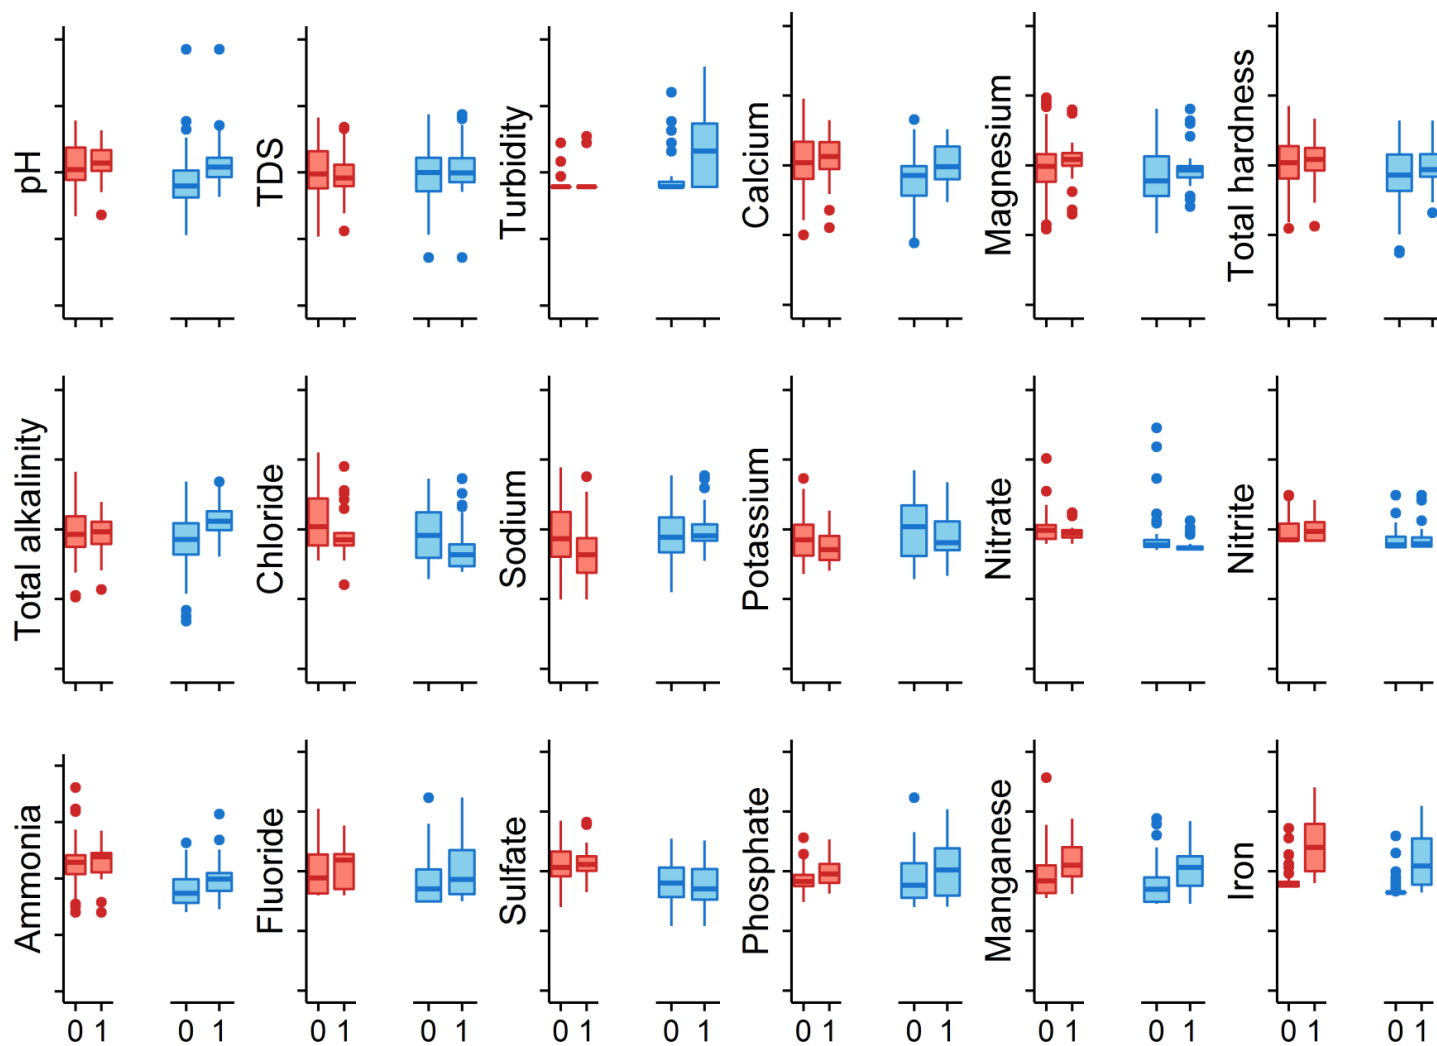

**Fig. S5.** Boxplots comparing the distribution of water quality values (y-axis) by presence or absence of the food staining complaint (x-axis) in the dry (red) and rainy (blue) season samples.

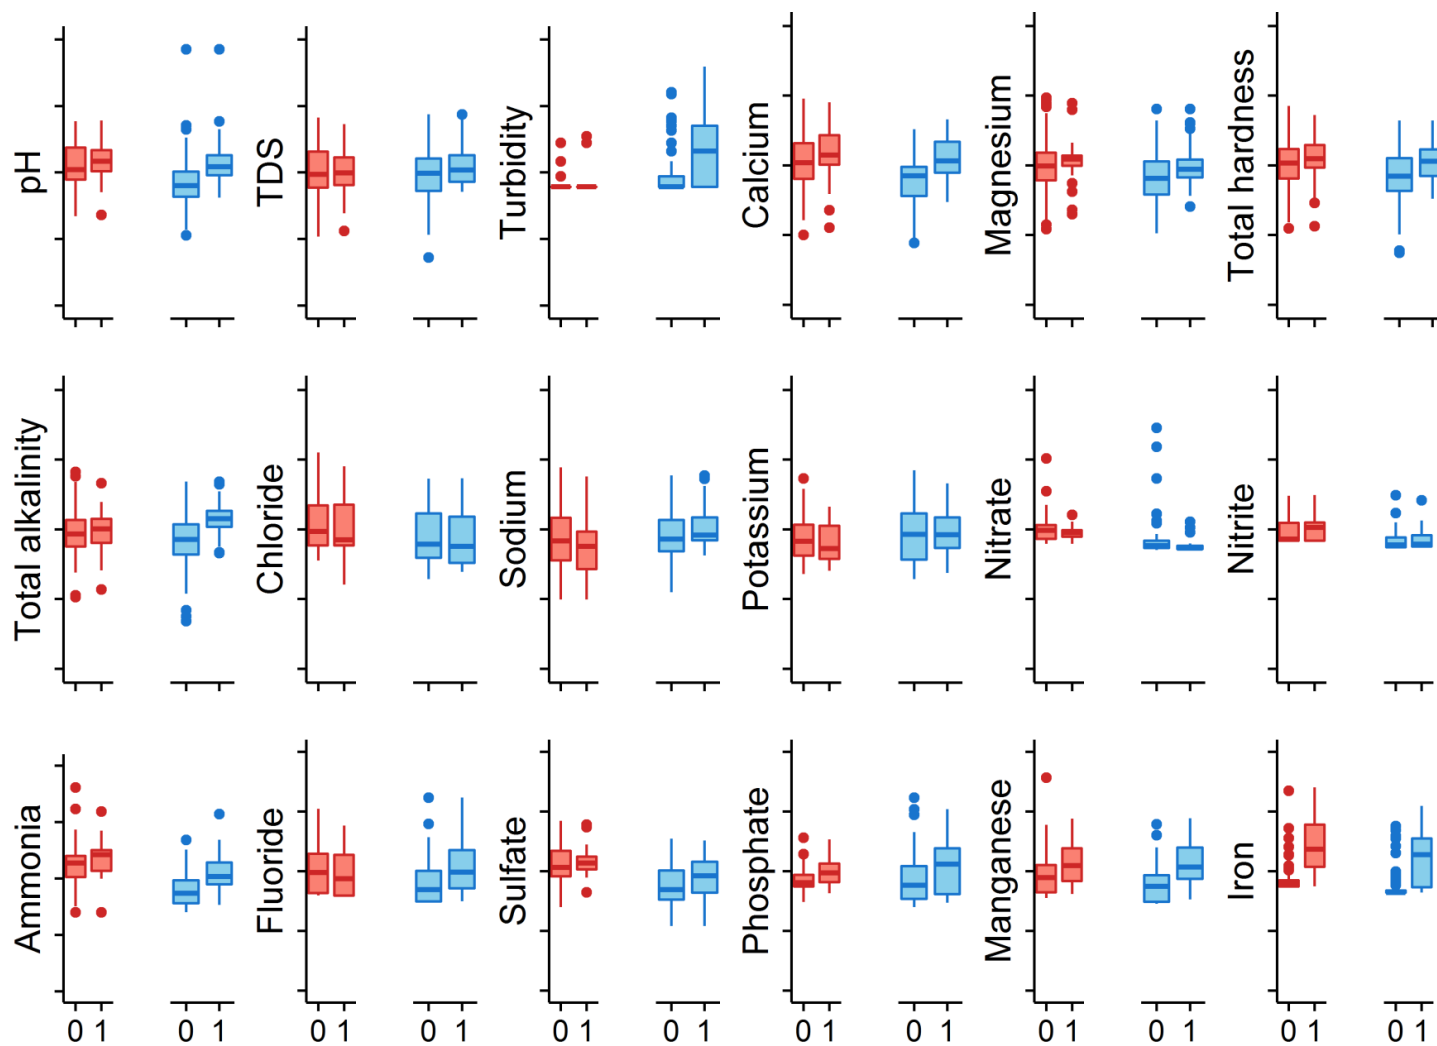



**Fig. S6.** Map of geological formations (A) and interpolated surfaces for iron (B) and TDS (C); map of Ghana is shown in the bottom right corner with the insets specified. Geological formations were digitized from maps in Schluter, 2008.

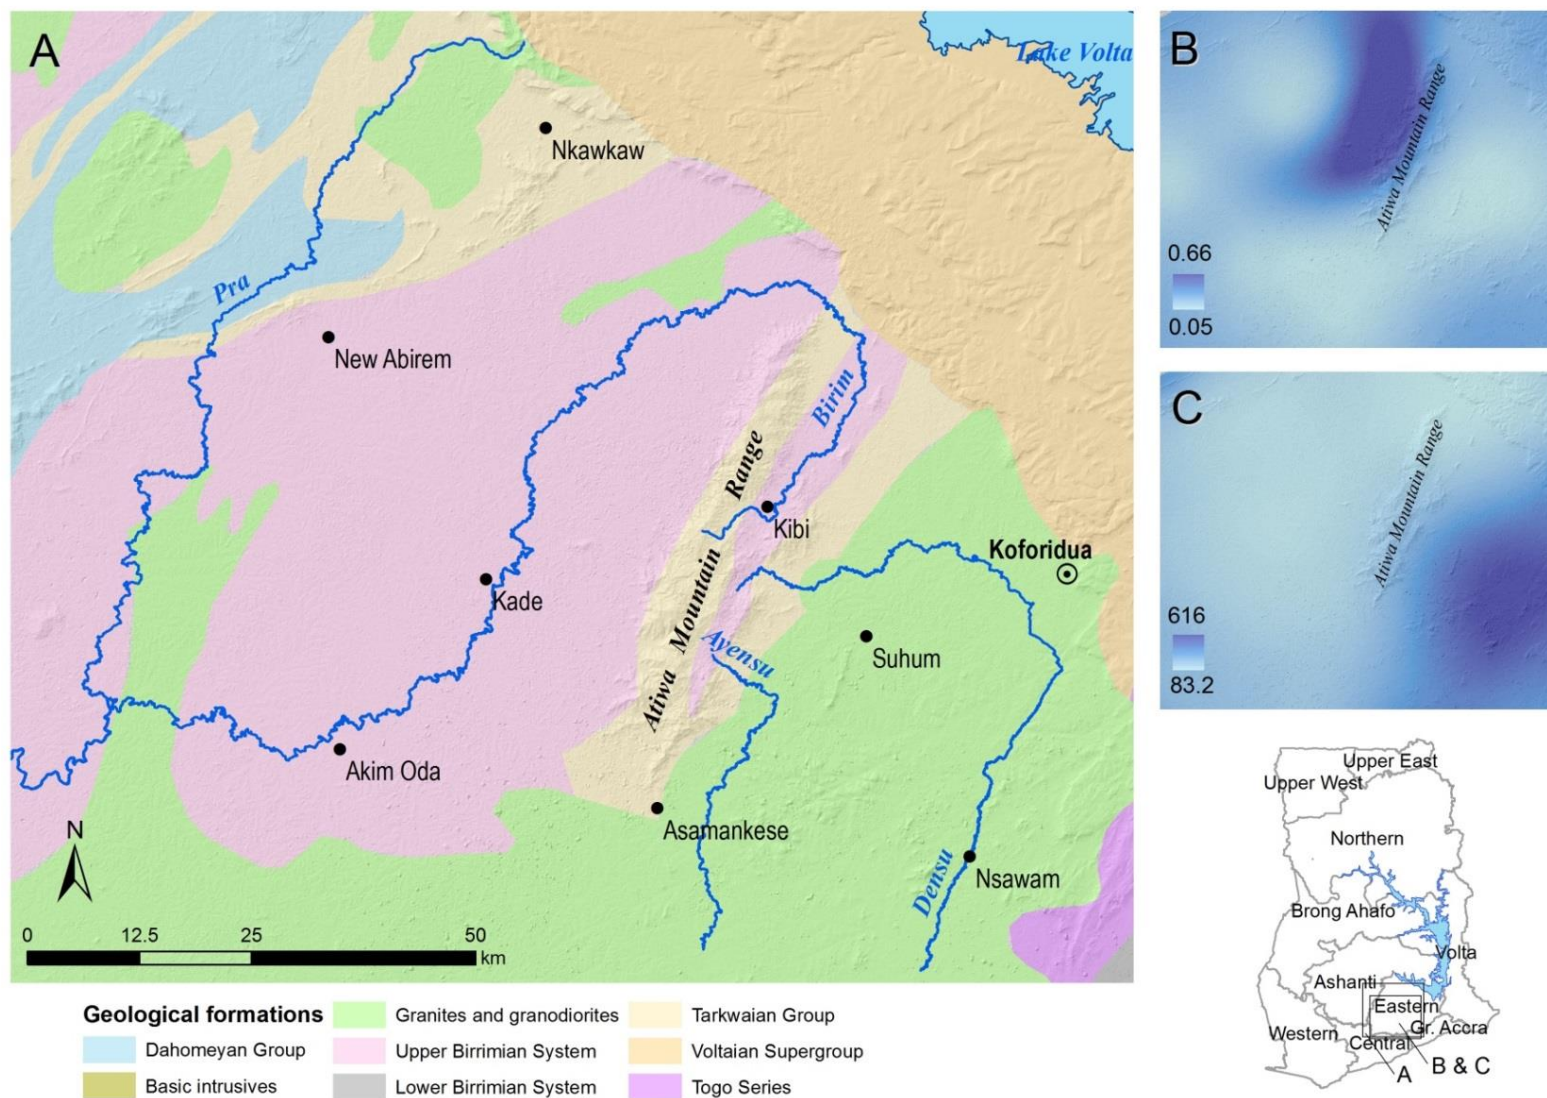

Supplement: NIHMS882135-supplement-s1.pdf [file NIHMS882135-supplement-s1.pdf]
